# Supplementary material for: The Effects of Community Home Visit and Peer Group Nutrition Intervention Delivery Platforms on Nutrition Outcomes in Low and Middle-Income Countries: A Systematic Review and Meta-Analysis
Source: PubMed Central journal article supplement (PMC7071285; doi:10.3390/nu12020440), 2020-02-10
Supplement: nutrients-12-00440-s001.pdf [file nutrients-12-00440-s001.pdf]

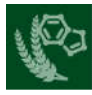

**Table S1.** MEDLINE search strategy. Ovid MEDLINE(R) Epub Ahead of Print, In-Process & Other Non-Indexed Citations, Ovid MEDLINE(R) Daily and Ovid MEDLINE(R) 1946 to Present.

| # | Searches                                                                                                                                                                                                                                                                                                                                                                                                                                                                                                                                                                                                                                                                                                                                                                                                                                                                                                                                                                                                                                                                                                                                                                                                                                                                                                                                                                                                                                                                                                                                                                                                             | Results |
|---|----------------------------------------------------------------------------------------------------------------------------------------------------------------------------------------------------------------------------------------------------------------------------------------------------------------------------------------------------------------------------------------------------------------------------------------------------------------------------------------------------------------------------------------------------------------------------------------------------------------------------------------------------------------------------------------------------------------------------------------------------------------------------------------------------------------------------------------------------------------------------------------------------------------------------------------------------------------------------------------------------------------------------------------------------------------------------------------------------------------------------------------------------------------------------------------------------------------------------------------------------------------------------------------------------------------------------------------------------------------------------------------------------------------------------------------------------------------------------------------------------------------------------------------------------------------------------------------------------------------------|---------|
| 1 | (pediatric* or paediatric* or child* or newborn* or congenital* or infan* or baby or babies or neonat* or "pre-term" or preterm* or "premature birth*" or NICU or preschool* or "pre-school*" or kindergarten* or kindergarden* or "elementary school*" or "nursery school*" or ("day care*" not adult*) or schoolchild* or toddler* or boy or boys or girl* or "middle school*" or pubescen* or juvenile* or teen* or youth* or "high school*" or adolesc* or "pre-pubesc*" or prepubesc*).tw,kf. or (child* or adolesc* or pediat* or paediat*).jn.                                                                                                                                                                                                                                                                                                                                                                                                                                                                                                                                                                                                                                                                                                                                                                                                                                                                                                                                                                                                                                                                | 2419824 |
| 2 | Prenatal care/ or Perinatal care/ or obstetrics/ or breast feeding/                                                                                                                                                                                                                                                                                                                                                                                                                                                                                                                                                                                                                                                                                                                                                                                                                                                                                                                                                                                                                                                                                                                                                                                                                                                                                                                                                                                                                                                                                                                                                  | 80549   |
| 3 | women/ or pregnant women/                                                                                                                                                                                                                                                                                                                                                                                                                                                                                                                                                                                                                                                                                                                                                                                                                                                                                                                                                                                                                                                                                                                                                                                                                                                                                                                                                                                                                                                                                                                                                                                            | 20520   |
| 4 | (obstetric* or gynecolog* or gynaecolog* or perinatal or prenatal or "pre natal" or antenatal or "ante natal" or postnatal or "post natal" or "maternal health" or gestation or pregnancies or pregnant or pregnancy or childbearing or gravidity or mother* or breastfeed* or "breast feeding" or woman or women).tw,kf.                                                                                                                                                                                                                                                                                                                                                                                                                                                                                                                                                                                                                                                                                                                                                                                                                                                                                                                                                                                                                                                                                                                                                                                                                                                                                            | 1659718 |
| 5 | or/1-4                                                                                                                                                                                                                                                                                                                                                                                                                                                                                                                                                                                                                                                                                                                                                                                                                                                                                                                                                                                                                                                                                                                                                                                                                                                                                                                                                                                                                                                                                                                                                                                                               | 3675093 |
| 6 | Developing Countries.sh,kf.                                                                                                                                                                                                                                                                                                                                                                                                                                                                                                                                                                                                                                                                                                                                                                                                                                                                                                                                                                                                                                                                                                                                                                                                                                                                                                                                                                                                                                                                                                                                                                                          | 80569   |
| 7 | (Africa or Asia or Caribbean or "West Indies" or "South America" or "Latin America" or "Central America").tw,kf,hw,cp.                                                                                                                                                                                                                                                                                                                                                                                                                                                                                                                                                                                                                                                                                                                                                                                                                                                                                                                                                                                                                                                                                                                                                                                                                                                                                                                                                                                                                                                                                               | 238412  |
| 8 | (Afghanistan or Albania or Algeria or Angola or Antigua or Barbuda or Argentina or Armenia or Armenian or Aruba or Azerbaijan or Bahrain or Bangladesh or Barbados or Benin or Byelarus or Byelorussian or Belarus or Belorussian or Belorussia or Belize or Bhutan or Bolivia or Bosnia or Herzegovina or Hercegovina or Botswana or Brasil or Brazil or Bulgaria or "Burkina Faso" or "Burkina Fasso" or "Upper Volta" or Burundi or Urundi or Cambodia or "Khmer Republic" or Kampuchea or Cameroon or Camerouns or Cameron or Camerons or "Cape Verde" or "Central African Republic" or Chad or Chile or China or Colombia or Comoros or "Comoro Islands" or Comores or Mayotte or Congo or Zaire or "Costa Rica" or "Cote d'Ivoire" or "Ivory Coast" or Croatia or Cuba or Cyprus or Czechoslovakia or "Czech Republic" or Slovakia or "Slovak Republic" or Djibouti or "French Somaliland" or Dominica or "Dominican Republic" or "East Timor" or "East Timur" or "Timor Leste" or Ecuador or Egypt or "United Arab Republic" or "El Salvador" or Eritrea or Estonia or Ethiopia or Fiji or Gabon or "Gabonese Republic" or Gambia or Gaza or "Georgia Republic" or "Georgian Republic" or Ghana or "Gold Coast" or Greece or Grenada or Guatemala or Guinea or Guam or Guiana or Guyana or Haiti or Honduras or Hungary or India or Maldives or Indonesia or Iran or Iraq or "Isle of Man" or Jamaica or Jordan or Kazakhstan or Kazakh or Kenya or Kiribati or Korea or Kosovo or Kyrgyzstan or Kirghizia or "Kyrgyz Republic" or Kirghiz or Kirgizstan or "Lao PDR" or Laos or Latvia or Lebanon or Lesotho | 3296449 |

- or Basutoland or Liberia or Libya or Lithuania or Macedonia or Madagascar or "Malagasy Republic" or Malaysia or Malaya or Malay or Sabah or Sarawak or Malawi or Nyasaland or Mali or Malta or "Marshall Islands" or Mauritania or Mauritius or "Agalega Islands" or Mexico or Micronesia or "Middle East" or Moldova or Moldavia or Moldovan or Mongolia or Montenegro or Morocco or Ifni or Mozambique or Myanmar or Myanma or Burma or Namibia or Nepal or "Netherlands Antilles" or "New Caledonia" or Nicaragua or Niger or Nigeria or "Northern Mariana Islands" or Oman or Muscat or Pakistan or Palau or Palestine or Panama or Paraguay or Peru or Philippines or Philipines or Phillipines or Phillippines or Poland or Portugal or Puerto Rico or Romania or Rumania or Roumania or Russia or Russian or Rwanda or Ruanda or "Saint Kitts" or "St Kitts" or Nevis or "Saint Lucia" or "St Lucia" or "Saint Vincent" or "St Vincent" or Grenadines or Samoa or "Samoan Islands" or "Navigator Island" or "Navigator Islands" or "Sao Tome" or "Saudi Arabia" or Senegal or Serbia or Montenegro or Seychelles or "Sierra Leone" or Slovenia or "Sri Lanka" or Ceylon or "Solomon Islands" or Somalia or "South Africa" or Sudan or Suriname or Surinam or Swaziland or Syria or Tajikistan or Tadjhikistan or Tadjikistan or Tadjhik or Tanzania or Thailand or Togo or "Togolese Republic" or Tonga or Trinidad or Tobago or Tunisia or Turkey or Turkmenistan or Turkmen or Uganda or Ukraine or Uruguay or USSR or "Soviet Union" or "Union of Soviet Socialist Republics" or Uzbekistan or Uzbek or Vanuatu or "New Hebrides" or Venezuela or Vietnam or "Viet Nam" or "West Bank" or Yemen or Yugoslavia or Zambia or Zimbabwe or Rhodesia).hw,kf,ti,ab,cp.
- 9 ((developing or "less\* developed" or "under developed" or underdeveloped or "middle income" or "low\* income" or underserved or "under served" or deprived or poor\*) adj1 (countr\* or nation? or population? or world)).tw. 82577
- 10 ((developing or "less\* developed" or "under developed" or underdeveloped or "middle income" or "low\* income") adj1 (economy or economies)).tw. 431
- 11 (low\* adj1 (gdp or gnp or "gross domestic" or "gross national")).tw. 214
- 12 (low adj3 middle adj3 countr\*).tw. 10025
- 13 (lmic or lmics or "third world" or "lami countr\*").tw. 5386
- 14 "transitional countr\*").tw. 142
- 15 or/6-14 3431580
- 16 5 and 15 638493
- 17 exp mass media/ or exp social media/ or blogging/ or social networking/ or radio/ 49544
- 18 (internet or "cyber space" or cyberspace or "world wide web" or "information and communication technologies" or "communication technolog\*" or ICTs or "communication application\*" or "communication apps").tw,kf. 47947
- 19 ((virtual or online) adj2 (communit\* or network\* or forum? or support\*)).tw,kf. 3687

- 20 ("mass media" or "social media" or "social medium?" or "social network\*" or  
sns or multimedia).tw,kf. 32173
- 21 (phone adj2 (app? or application?)).tw,kf. 654
- 22 ("push technolog\*" or "web 2.0" or "web 2.0s" or radio or television\* or TV or  
TVs or twitter or facebook or WeChat or weibo or YouTube or whatsapp or  
blogging or blog? or "hash tag\*" or hashtag\* or microblog\* or "chat room" or  
"internet chat" or "online chat" or email or wiki\*).tw,kf. 71957
- 23 (sms or "short messag\*" or text\* or "mobile outreach" or "mobile out reach" or  
mms or smartphone\* or telephone\* or cellphone\*).tw,kf. 186576
- 24 ((text or short or instant or multimedia or "multi-media") adj1 messag\*).tw,kf. 3561
- 25 ((car or cell or cellular or mobile or smart) adj1 (phone or phones or  
telephone\*)).tw,kf. 9888
- 26 (mobile adj2 communication).tw,kf. 553
- 27 (mhealth or "m-health" or ehealth or "e-health" or "mobile medicine" or "mobile  
health").tw,kf. 7698
- 28 or/17-27 363999
- 29 16 and 28 12150
- 30 ((cash or money or monetary or electronic) adj1 (transfer\* or assistant\* or  
voucher\* or allowance?)).tw,kf. 856
- 31 ("mobile money" or "mobile pay" or "e-transfer" or "etranfer" or "financial  
assistance" or "financial support" or "food stamp?" or "food voucher?" or "food  
assistance" or "cash credit").tw,kf. 5313
- 32 food supply/ or ("food insecurity\*" or "food security" or "food suppl\*" or "social  
protection").tw,kf. 21224
- 33 or/30-32 26978
- 34 16 and 33 3637
- 35 ("community health" adj1 (service? or centre? or center? or promotion or "out  
reach" or outreach)).tw,kf. 5192
- 36 (("health care" or healthcare or health) adj1 (worker? or personnel or volunteer\*  
or provider\* or network or campaign\* or alliance)).tw,kf. 55879
- 37 ((community or "community based") adj1 (program\* or network\* or mobili?er  
or "out reach" or outreach or aide? or involvement or participation)).tw,kf. 7874
- 38 ("volunt\* worker?" or "peer group?" or "wom#n group?" or "wom#n's group?"  
or "child health day" or "integrated management of childhood illness" or

|                                                                                                                                                                                                                |         |
|----------------------------------------------------------------------------------------------------------------------------------------------------------------------------------------------------------------|---------|
| IMCI).tw,kf.                                                                                                                                                                                                   |         |
| 39 or/35-38                                                                                                                                                                                                    | 72293   |
| 40 16 and 39                                                                                                                                                                                                   | 12726   |
| 41 29 or 34 or 40                                                                                                                                                                                              | 27224   |
| ("macro-nutrient" or "macro nutrient" or macronutrient or malnutrition or<br>42 malnourishment or nutraceutical* or undernutrition or undernourishment or<br>underfeeding or malabsorption or nourish*).tw,kf. | 66558   |
| 43 (diet? or dietary or nutrition* or supplement* or food? or feed*).tw,kf.                                                                                                                                    | 1345156 |
| 44 or/42-43                                                                                                                                                                                                    | 1373414 |
| 45 41 and 44                                                                                                                                                                                                   | 6738    |
| 46 limit 45 to yr="1997 -Current"                                                                                                                                                                              | 4814    |
| 47 limit 46 to english language                                                                                                                                                                                | 4428    |

Table S2: Characteristics of included studies for home visit and group platforms <sup>a, b</sup>

| Author               | Year | Country    | Study / trial / intervention period                                                      | Study design                | Participants                  | Study sample | Platform    | Intervention                                                                                                                                                                                                                                                                           | Outcomes                           |
|----------------------|------|------------|------------------------------------------------------------------------------------------|-----------------------------|-------------------------------|--------------|-------------|----------------------------------------------------------------------------------------------------------------------------------------------------------------------------------------------------------------------------------------------------------------------------------------|------------------------------------|
| Ara et al [35]       | 2018 | Bangladesh | Enrolled women between September 2014 and July 2016                                      | Cluster-randomized trial    | Mother-child dyads            | 350          | Home visits | CHW made 10 home counseling visits for prenatal care, nutrition and IYCF practices: 3 in the last trimester of pregnancy, 3 in the 1st month after delivery (1 within 48 hr of delivery, 1 10–14 days after, and 1 24–28 days after), and 4 visits during 2 to 6 months after delivery | EIBF<br>EBF<br>LBW<br>Birth weight |
| Aracena et al [36]   | 2009 | Chile      | 15 months                                                                                | Randomized controlled trial | Adolescent mother-child dyads | 90           | Home visits | CHW home visits from 3rd trimester to 1 year of age for maternal and child health and nutrition counseling                                                                                                                                                                             | Anemia<br>Underweight              |
| Attanasio et al [37] | 2014 | Colombia   | Intervention period February-May 2010 to September-December 2011; intervention 18 months | Cluster-randomized trial    | Mother-child dyads            | 626          | Home visits | CHW home visits for education and provision of multiple micronutrient powder supplements                                                                                                                                                                                               | Hemoglobin<br>Height<br>Weight     |
| Ayiasi et al [38]    | 2016 | Uganda     | Study period May/June 2013 to October/December 2014                                      | Randomized controlled trial | Mother-infant dyads           | 1385         | Home visits | CHW prenatal and postnatal home visits for maternal and newborn care counseling                                                                                                                                                                                                        | EIBF                               |

|                     |      |              |                                                                                               |                                               |                     |        |             |                                                                                                                                                                                                                                                                  |            |
|---------------------|------|--------------|-----------------------------------------------------------------------------------------------|-----------------------------------------------|---------------------|--------|-------------|------------------------------------------------------------------------------------------------------------------------------------------------------------------------------------------------------------------------------------------------------------------|------------|
| Balaluka et al [39] | 2012 | DRC          | Project period 2004 to 2006                                                                   | Quasi-experimental evaluation                 | Mother-child dyads  | 386    | Home visits | CHW promotion of exclusive breastfeeding from birth through door-to-door visits                                                                                                                                                                                  | EBF Weight |
| Gabida et al [40]   | 2015 | Zimbabwe     | Intervention period 3 months                                                                  | Two-by-two factorial cluster randomized trial | Mother-child dyads  | 357    | Home visits | CHW provided breastfeeding education at facility or community                                                                                                                                                                                                    | EIBF EBF   |
| Haider et al [41]   | 2000 | Bangladesh   | Enrolment February - December 1996; infants followed to 5 months of age                       | Cluster-randomized trial                      | Mother-child dyads  | 726    | Home visits | CHW home visits: 2 in last trimester of pregnancy, 4 in first month (1 within 48 h of delivery, 1 on day 5, 1 during days 10–14, and 1 during days 24–28); Fortnightly visits in months 2–5; Total number of scheduled visits was 15 for breastfeeding promotion | EIBF EBF   |
| Hanson et al [42]   | 2015 | Tanzania     | Study period 2010-2013                                                                        | Cluster-randomized trial                      | Mother-child dyads  | 14,295 | Home visits | CHW home-based counselling for maternal care and early and exclusive breastfeeding 3 times in pregnancy and 2 times in early postpartum.                                                                                                                         | EIBF       |
| Ijumba et al [43]   | 2015 | South Africa | Participants recruited June 2008 to December 2010 and data collection was concluded July 2011 | Cluster-randomized trial                      | Mother-infant dyads | 3494   | Home visits | CHW home visits during pregnancy and postpartum for infant feeding counseling                                                                                                                                                                                    | EIBF       |

|                          |      |            |                                                         |                               |                                  |                                               |             |                                                                                                                                                               |                                                                 |
|--------------------------|------|------------|---------------------------------------------------------|-------------------------------|----------------------------------|-----------------------------------------------|-------------|---------------------------------------------------------------------------------------------------------------------------------------------------------------|-----------------------------------------------------------------|
| Kimani-Murage et al [44] | 2017 | Kenya      | Recruitment September 2012 to February 2014             | Cluster-randomized trial      | Mother-child dyads               | 1110                                          | Home visits | CHW home visits for maternal, infant and young child nutrition counseling                                                                                     | EBF                                                             |
| Leite et al [45]         | 2005 | Brazil     | Trial period November 1996 to April 1997                | Randomized controlled trial   | Mother-newborn dyads             | 1003                                          | Home visits | CHW home visits from postpartum to 120 days after birth for breastfeeding counseling                                                                          | EBF                                                             |
| McDougal et al [46]      | 2017 | India      | Baseline January-April 2012; Endline January-April 2014 | Quasi-experimental study      | Mother-child dyads               | 7191 Baseline; 6143 Endline (cross-sectional) | Home visits | Accredited Social Health Activist, auxiliary nurse midwife, and Anganwadi worker home visits in pregnancy and early postpartum for RMNH counseling            | EIBF                                                            |
| Nayak et al [47]         | 2016 | India      | Study period September 2006 to July 2009                | Cluster-randomized trial      | Mother-child dyads               | 77                                            | Home visits | Home visits for nutrition and IYCF counseling starting during the third trimester of pregnancy and after delivery at 2, 5, 8, 11, 14, 16 and 20 months of age | EIBF<br>EBF<br>Continued BF<br>Birth weight<br>Length<br>Weight |
| Nguyen et al [48]        | 2017 | Bangladesh | Baseline 2015; Endline 2016                             | Cluster-randomized evaluation | Mother-infant dyads              | Baseline 2000; Endline 2000                   | Home visits | Health worker and CHW home visits during pregnancy and postpartum for maternal and infant care counseling                                                     | MDD<br>EIBF<br>EBF                                              |
| Nguyen et al [49]        | 2018 | Bangladesh | Baseline June-Aug 2015; Endline June- Aug               | Cluster-randomized evaluation | Pregnant and post-partum mothers | Baseline 2000; Endline 2000 (cross            | Home visits | Health worker and CHW home visits during pregnancy and postpartum for maternal and infant care counseling                                                     | IFA coverage                                                    |

|                      |      |             |                                          |                                |                    |                             |             |                                                                                                                                            |                                                      |
|----------------------|------|-------------|------------------------------------------|--------------------------------|--------------------|-----------------------------|-------------|--------------------------------------------------------------------------------------------------------------------------------------------|------------------------------------------------------|
|                      |      |             | 2016                                     |                                |                    | sectional)                  |             |                                                                                                                                            |                                                      |
| Ochola et al [50]    | 2013 | Kenya       | Trial period April 2006 to April 2008    | Cluster-randomized trial       | Mother-child dyads | 240                         | Home visits | 7 home visit counseling sessions: 1 prenatal, 1 during the first week after delivery, and the 3rd to 7th monthly up to 5 months postpartum | EBF                                                  |
| Penfold et al [51]   | 2014 | Tanzania    | Study period 2010-2011                   | Cluster-randomized trial       | Mother-child dyads | 512                         | Home visits | CHW home visits during pregnancy and postpartum for newborn care and breastfeeding counseling                                              | EIBF                                                 |
| Rahman et al [52]    | 2016 | Bangladesh  | Baseline 2008; Endline 2012              | Quasi-experimental evaluation  | Mother-child dyads | Baseline 3118; Endline 1527 | Home visits | CHW home visits for maternal newborn, child health and nutrition counseling                                                                | EIBF                                                 |
| Risonar et al [53]   | 2008 | Philippines | Baseline June 2002; Endline January 2003 | Controlled before- after study | Pregnant women     | Baseline 598; Endline 582   | Home visits | CHW/TBA home visit prenatal care counseling and IFA distribution                                                                           | IFA consumption<br>Anemia                            |
| Saleem et al [54]    | 2014 | Pakistan    | Intervention 30 weeks                    | Cluster-randomized trial       | Mother-child dyads | 212                         | Home visits | CHW home visits for IYCF counseling                                                                                                        | Stunting<br>Underweight<br>Wasting                   |
| Singh et al (a) [55] | 2017 | India       | Study period 2004-2006                   | Quasi-experimental study       | Mother-child dyads | 957                         | Home visits | Anganwadi workers counseled on breastfeeding and complementary feeding                                                                     | EIBF<br>EBF<br>Stunting<br>Underweight<br>LAZ<br>WAZ |



|                      |      |            |                                                                                                     |                               |                    |                |                                   |                                                                                                                                                                                                                                                    | Length<br>Weight                                                     |
|----------------------|------|------------|-----------------------------------------------------------------------------------------------------|-------------------------------|--------------------|----------------|-----------------------------------|----------------------------------------------------------------------------------------------------------------------------------------------------------------------------------------------------------------------------------------------------|----------------------------------------------------------------------|
| Singh et al (b) [56] | 2017 | India      | Study period May 2004 to July 2006                                                                  | Quasi-experimental evaluation | Mother-child dyads | 942            | Home visits                       | Anganwadi worker home visits from pregnancy to 2 years for IYCF counseling                                                                                                                                                                         | EIBF<br>EBF<br>VAS                                                   |
| Vir et al [57]       | 2014 | India      | Project period 2009 - 2011                                                                          | Quasi-experimental study      | Mother-child dyads | 3626           | Home visits                       | CHW home visits for IYCF counseling                                                                                                                                                                                                                | EIBF<br>EBF<br>Underweight<br>Stunting<br>Wasting<br>IFA consumption |
| Zhou et al [58]      | 2016 | China      | Baseline April and October 2013; Endline October 2013 and April 2014 ; intervention period 6 months | Cluster-randomized trial      | Mother-child dyads | 1818           | Home visits<br><br>Multi-platform | Intervention 1: One-on-one counseling on nutrition and feeding practices and 6-month supply of MNP<br><br>Intervention 2: One-on-one counseling on nutrition and feeding practices and 6-month supply of MNP plus daily text MNP reminder messages | Anemia<br>MNP<br>consumption                                         |
| Fottrell et al [59]  | 2013 | Bangladesh | Trial period January 2009 to June 2011                                                              | Cluster-randomized trial      | Mother-child dyads | 9895           | Group sessions                    | Monthly women's groups facilitated by CHWs relating to women's health                                                                                                                                                                              | EIBF                                                                 |
| Harris-Fry et al     | 2016 | Bangladesh | Baseline survey                                                                                     | Controlled                    | WRA                | Baseline 5355; | Group                             | Monthly women's groups for health/nutrition                                                                                                                                                                                                        | Women's dietary                                                      |

|                         |      |          |                                                                                             |                                                |                    |                           |                |                                                                                                |                                                         |
|-------------------------|------|----------|---------------------------------------------------------------------------------------------|------------------------------------------------|--------------------|---------------------------|----------------|------------------------------------------------------------------------------------------------|---------------------------------------------------------|
| [60]                    |      |          | October-December 2011; Endline survey<br>February-March 2013; intervention lasted 13 months | before-after study                             |                    | Endline 5128              | sessions       | promotion                                                                                      | diversity                                               |
| Kang et al [61]         | 2017 | Ethiopia | Intervention period August 2012 to August 2013                                              | Cluster-randomized trial                       | Mother-child dyads | 1790                      | Group sessions | CHW led 2 week daily group nutrition education and cooking session and child growth monitoring | Dietary diversity                                       |
| Kang et al (b) [62]     | 2017 | Ethiopia | Intervention period August 2012 to August 2013                                              | Evaluation using cluster-randomized trial data | Mother-child dyads | 1790                      | Group sessions | CHW led 2 week daily group nutrition education and cooking session and child growth monitoring | Continued BF<br>MDD<br>MMF                              |
| Kang et al (a) [63]     | 2017 | Ethiopia | Intervention period August 2012 to August 2013                                              | Cluster-randomized trial                       | Mother-child dyads | 1790                      | Group sessions | CHW led 2 week daily group nutrition education and cooking session and child growth monitoring | LAZ<br>WAZ<br>WHZ<br>Stunting<br>Wasting<br>Underweight |
| Kuchenbecker et al [64] | 2017 | Malawi   | Baseline August/September 2011; Endline August/September 2014; intervention                 | Cluster-randomized trial                       | Mother-child dyads | Baseline 832; Endline 959 | Group sessions | CHW led group sessions for IYCF promotion                                                      | WAZ<br>HAZ<br>WHZ<br>MDD<br>MMF                         |

|                     |      |              |                                                                                                                                                              |                                |                    |                           |                                   |                                                                                                                                                                                                                                                                           |                                    |
|---------------------|------|--------------|--------------------------------------------------------------------------------------------------------------------------------------------------------------|--------------------------------|--------------------|---------------------------|-----------------------------------|---------------------------------------------------------------------------------------------------------------------------------------------------------------------------------------------------------------------------------------------------------------------------|------------------------------------|
|                     |      |              | period 5 months                                                                                                                                              |                                |                    |                           |                                   |                                                                                                                                                                                                                                                                           | MAD<br>Continued BF                |
| Lewycka et al [65]  | 2013 | Malawi       | Study period Feb 2006 to Jan 2009 for the women's group intervention;<br>Study period July 2005 to June 2008 for the volunteer peer counselling intervention | Cluster-randomized trial       | Mother-child dyads | 3002                      | Group sessions<br><br>Home visits | 20 women's group meetings related to maternal and child health<br><br>CHW made 5 home visits: in the 3rd trimester, in the week after birth, and at 1 month, 3 months, and 5 months after delivery for health education including exclusive breastfeeding and infant care | EIBF<br>EBF                        |
| More et al [66]     | 2012 | India        | Trial period October 2006 to September 2009                                                                                                                  | Cluster-randomized trial       | Mothers            | 15,192                    | Group sessions                    | CHW led women's group sessions for prenatal care promotion                                                                                                                                                                                                                | IFA consumption                    |
| Mushaphi et al [67] | 2015 | South Africa | Study period 2007-2009; intervention period 12 months                                                                                                        | Controlled before- after study | Mother-child dyads | Baseline 129; Endline 89  | Group sessions                    | Group nutrition education sessions twice a week on child feeding                                                                                                                                                                                                          | Stunting<br>Underweight<br>Wasting |
| Negash et al [68]   | 2014 | Ethiopia     | Study period September 2012 to March 2013                                                                                                                    | Controlled before- after study | Mother-child dyads | Baseline 197; Endline 153 | Group sessions                    | Group sessions for mothers on IYCF promotion including cooking demonstration                                                                                                                                                                                              | Continued BF<br>MMF<br>MDD         |

|                     |      |            |                                                                 |                                |                     |                                |                                      |                                                                                                                                                                                                                                  |                                                                                                                                    |
|---------------------|------|------------|-----------------------------------------------------------------|--------------------------------|---------------------|--------------------------------|--------------------------------------|----------------------------------------------------------------------------------------------------------------------------------------------------------------------------------------------------------------------------------|------------------------------------------------------------------------------------------------------------------------------------|
| Tripathy et al [69] | 2016 | India      | Baseline Sept 2009 to Aug 2010;<br>Endline Jan 2011 to Dec 2012 | Cluster-randomized trial       | Mother-child dyads  | 7219                           | Group sessions                       | Accredited Social Health Activists led women's group meetings during pregnancy for maternal and newborn health promotion                                                                                                         | EIBF                                                                                                                               |
| Yadav et al [70]    | 2014 | Nepal      | Study period February 2012 to November 2013                     | Controlled before- after study | Mother-child dyads  | Baseline 615;<br>Endline 708   | Group sessions                       | CHW led monthly nutrition education group sessions                                                                                                                                                                               | Stunting<br>Underweight<br>Wasting<br>EIBF<br>EBF<br>VAS                                                                           |
| Younes et al [71]   | 2015 | Bangladesh | Intervention period 2010-2011                                   | Controlled before-after study  | Mother-child dyads  | Baseline 1897;<br>Endline 2270 | Group sessions                       | Women's groups for maternal, neonatal and child health promotion                                                                                                                                                                 | EBF<br>MDD                                                                                                                         |
| Saville et al [72]  | 2018 | Nepal      | Project period 2013 to 2015                                     | Cluster-randomized trial       | Mother-infant dyads | 7079                           | Group sessions<br><br>Multi-platform | Intervention 1: CHW led monthly women's groups for prenatal health and nutrition promotion<br><br>Intervention 2: CHW led monthly women's groups for prenatal health and nutrition promotion plus cash transfer (US\$ 7.5/month) | WAZ<br>HAZ<br>WHZ<br>EIBF<br>EBF<br>Continued BF<br>Dietary diversity<br>Birth weight<br>LBW<br>Underweight<br>Stunting<br>Wasting |

|                       |      |       |                                                                              |                               |                    |                             |                                |                                                                                                                                                                                                                                                                                                                                                                                           |                                                |
|-----------------------|------|-------|------------------------------------------------------------------------------|-------------------------------|--------------------|-----------------------------|--------------------------------|-------------------------------------------------------------------------------------------------------------------------------------------------------------------------------------------------------------------------------------------------------------------------------------------------------------------------------------------------------------------------------------------|------------------------------------------------|
| Bhandari et al [73]   | 2003 | India | Infants born between October 1999 and June 2000 followed to 6 months of age  | Cluster-randomized trial      | Mother-child dyads | 1025                        | Home visits and group sessions | Monthly home visits for new mothers until child aged 12 months including IYCF messages and weighing once every 3 months for children 2 yrs old conducted by Anganwadi workers; monthly meetings conducted by the auxiliary nurse midwives with community representatives who held neighborhood meetings once a month with caretakers of children 2 yrs old including nutrition counseling | EBF<br>Wasting<br>Stunting<br>Weight<br>Length |
| Bhandari et al [74]   | 2004 | India | Infants born between October 1999 and June 2000 followed to 18 months of age | Cluster-randomized trial      | Mother-child dyads | 1025                        | Home visits and group sessions | Monthly home visits for new mothers until child aged 12 months including IYCF messages and weighing once every 3 months for children 2 yrs old conducted by Anganwadi workers; monthly meetings conducted by the auxiliary nurse midwives with community representatives who held neighborhood meetings once a month with caretakers of children 2 yrs old including nutrition counseling | Underweight<br>Weight<br>Stunting<br>Length    |
| Brasington et al [75] | 2016 | Egypt | Baseline September-October 2012; Endline January-February 2014               | Quasi-experimental evaluation | Mother-child dyads | Baseline 3199; Endline 3445 | Home visits and group sessions | CHW led group sessions with pregnant women, home visits for postpartum women, group sessions for mothers of children 6 months to 2 years and growth monitoring                                                                                                                                                                                                                            | IFA consumption<br>EBF                         |

|                      |      |                          |                                                          |                                     |                    |                                                                   |                                |                                                                                                                                                     |                                             |
|----------------------|------|--------------------------|----------------------------------------------------------|-------------------------------------|--------------------|-------------------------------------------------------------------|--------------------------------|-----------------------------------------------------------------------------------------------------------------------------------------------------|---------------------------------------------|
|                      |      |                          |                                                          |                                     |                    |                                                                   |                                |                                                                                                                                                     |                                             |
| Brenner et al [76]   | 2011 | Uganda                   | Project period 2006-2009                                 | Controlled before- after evaluation | Mother-child dyads | Baseline 1118; Endline 1092                                       | Home visits and group sessions | CHW home visits and group sessions for child health/nutrition promotion                                                                             | Underweight                                 |
| Bhutta et al [77]    | 2008 | Pakistan                 | Baseline May - June 2003; Endline August -September 2005 | Quasi-experimental study            | Mother-child dyads | 770                                                               | Home visits and group sessions | Lady Health Worker home visits during pregnancy and postpartum and group education sessions for prenatal and neonatal care, breastfeeding promotion | EIBF<br>EBF                                 |
| Crookston et al [78] | 2007 | Cambodia                 | Baseline 2004; Endline 2005 (1 year later)               | Controlled before- after study      | Mother-child dyads | Baseline 440; Endline 467                                         | Home visits and group sessions | Community “nun” home visits and group sessions for breastfeeding counseling                                                                         | EIBF<br>EBF                                 |
| Fenn et al [79]      | 2012 | Ethiopia                 | Baseline 2004; Endline 2009                              | Controlled before- after evaluation | Mother-child dyads | Baseline 2509; Endline 1719                                       | Home visits and group sessions | CHW home visits and group education sessions on maternal nutrition and IYCF practices                                                               | HAZ<br>Stunting<br>Dietary diversity<br>VAS |
| Kung'u et al [80]    | 2018 | Ethiopia, Kenya, Senegal | Baseline 2013; Endline 2015                              | Quasi-experimental evaluation       | Mother-child dyads | Ethiopia: Baseline 1968; Endline 1460<br><br>Kenya: Baseline 682; | Home visits and group sessions | Home and group behaviour change counseling for maternal and child health and nutrition                                                              | IFA consumption<br>EIBF<br>EBF              |

|                     |      |             |                                                                                                        |                                |                    |                                            |                                |                                                                                                                                |                                                                                        |
|---------------------|------|-------------|--------------------------------------------------------------------------------------------------------|--------------------------------|--------------------|--------------------------------------------|--------------------------------|--------------------------------------------------------------------------------------------------------------------------------|----------------------------------------------------------------------------------------|
|                     |      |             |                                                                                                        |                                |                    | Endline 735                                |                                |                                                                                                                                |                                                                                        |
|                     |      |             |                                                                                                        |                                |                    | Senegal:<br>Baseline 1925;<br>Endline 1995 |                                |                                                                                                                                |                                                                                        |
| Lamstein et al [81] | 2017 | Nigeria     | Baseline December 2014 to June 2015;<br>Endline January and March 2017;<br>18 months of implementation | Quasi-experimental evaluation  | Mother-child dyads | Baseline 3525;<br>Endline 5366             | Home visits and group sessions | CHW led group meetings, home visits, and community events for maternal, infant, and young child health and nutrition promotion | EIBF<br>EBF<br>Continued BF<br>Stunting<br>Underweight<br>Wasting<br>MMF<br>MAD<br>MDD |
| Liang et al [82]    | 2018 | China       | Baseline 2001;<br>Endline 2005                                                                         | Controlled before- after study | Mother-child dyads | Baseline 11,704;<br>Endline 11118          | Home visits and group sessions | CHW health and nutrition counseling, child growth monitoring                                                                   | EIBF<br>EBF<br>Stunting<br>Underweight<br>Wasting<br>VAS                               |
| Mayhew et al [83]   | 2014 | Afghanistan | Matched comparison analysis between June and August                                                    | Pre-post evaluation            | Mother-child dyads | 828                                        | Home visits and group sessions | CHW nutrition counseling and growth monitoring                                                                                 | WAZ                                                                                    |

|                    |      |            |                                                                                                      |                                       |                        |                              |                                         |                                                                                                                                         |                                                                                             |
|--------------------|------|------------|------------------------------------------------------------------------------------------------------|---------------------------------------|------------------------|------------------------------|-----------------------------------------|-----------------------------------------------------------------------------------------------------------------------------------------|---------------------------------------------------------------------------------------------|
|                    |      |            | 2011                                                                                                 |                                       |                        |                              |                                         |                                                                                                                                         |                                                                                             |
| Memon et al [84]   | 2015 | Pakistan   | Intervention period<br>18 months                                                                     | Quasi-experi-<br>mental<br>evaluation | Mother-child<br>dyads  | Baseline 708;<br>Endline 677 | Home<br>visits and<br>group<br>sessions | Lady Health Worker/CHW home visits,<br>group education/video sessions for maternal<br>and newborn health and nutrition promotion        | EIBF                                                                                        |
| Nair et al [85]    | 2017 | India      | Study included<br>infants born to<br>pregnant women<br>recruited between<br>Oct 2013 and Feb<br>2015 | Cluster-rando-<br>mized trial         | Mother-child<br>dyads  | 3001                         | Home<br>visits and<br>group<br>sessions | CHW home visits from pregnancy to 2 years<br>on IYCF; monthly women's group meetings<br>to promote nutrition                            | Birthweight<br>Stunting<br>Wasting<br>Underweight<br>LAZ<br>WHZ<br>WAZ<br>EBF<br>MDD<br>MMF |
| Owais et al [86]   | 2017 | Bangladesh | Project period<br>January 2011 to<br>January 2014                                                    | Quasi-experi-<br>mental study         | Mother- child<br>dyads | 2400                         | Home<br>visits and<br>group<br>sessions | CHW home visits for IYCF counseling;<br>mothers support groups                                                                          | Stunting<br>LAZ<br>WLZ<br>MAD                                                               |
| Rockers et al [87] | 2016 | Zambia     | Baseline<br>August/September<br>2014; Endline<br>September/October                                   | Cluster-rando-<br>mized trial         | Mother-child<br>dyads  | 526                          | Home<br>visits and<br>group<br>sessions | CHW home visits for child education and<br>malnutrition screening; mother group<br>meetings for child health and nutrition<br>promotion | HAZ<br>Stunting<br>WAZ<br>Underweight                                                       |



|                      |      |              |                                                                                 |                               |                    |                           |                                |                                                                                                                      |                                                    |
|----------------------|------|--------------|---------------------------------------------------------------------------------|-------------------------------|--------------------|---------------------------|--------------------------------|----------------------------------------------------------------------------------------------------------------------|----------------------------------------------------|
|                      |      |              | 2015; 1-year study intervention period                                          |                               |                    |                           |                                |                                                                                                                      | Dietary diversity                                  |
| Shi et al [88]       | 2009 | China        | Baseline April–September 2006 (2–4 months of age); followed to 12 months of age | Cluster-randomized trial      | Mother-child dyads | 599                       | Home visits and group sessions | Group sessions and home visits for IYCF counseling and recipes                                                       | Continued BF<br>Meal frequency<br>Weight<br>Length |
| Walsh et al [89]     | 2002 | South Africa | Project period 2 years                                                          | Quasi-experimental evaluation | Mother-child dyads | Baseline 536; Endline 815 | Home visits and group sessions | CHW home visits and community groups for nutrition promotion                                                         | Wasting<br>Stunting<br>Underweight                 |
| Yousafzai et al [90] | 2014 | Pakistan     | Trial period between June 2009 to March 2012                                    | Cluster-randomized trial      | Mother-child dyads | 732                       | Home visits and group sessions | Lady Health Worker home visits and group meetings for nutrition education; children 6–24 months given MNP supplement | HAZ<br>WAZ<br>WHZ                                  |

<sup>a</sup> BF, breastfeeding; EIBF, early initiation of breastfeeding; EBF, exclusive breastfeeding; IFA, iron folic acid; LBW, low birth weight; MNP, multiple micronutrient powder; MDD, minimum dietary diversity; MMF, minimum meal frequency; MAD, minimum acceptable diet; HAZ, height-for-age z-score; LAZ, length-for-age z-score; VAS, vitamin A supplementation; WAZ, weight-for-age z-score; WHZ, weight-for-height z-score. N = 82 as Yousafzai, 2018 (doi: 10.1111/nyas.13649) included only for coverage outcome.

<sup>b</sup> Control is care as usual unless otherwise indicated in the intervention column.
